# Supplementary material for: Modeling CMAQ dry deposition treatment over Western Pacific: A distinct characteristic of mineral dust and anthropogenic aerosol
Source: Copernicus journal article supplement (doi:10.5194/egusphere-2024-2549), 2024-09-10
Supplement: Supplementary file 1 [file egusphere-2024-2549-supplement.pdf]

## Supplementary Information

### Modeling CMAQ dry deposition treatment over Western Pacific: A distinct characteristic of mineral dust and anthropogenic aerosol

Steven Soon-Kai Kong<sup>1</sup>, Joshua S. Fu<sup>2</sup>, Neng-Huei Lin<sup>1,3,\*</sup>, Guey-Rong Sheu<sup>1,3,\*</sup>, Wei-Syun Huang<sup>1</sup>

<sup>1</sup>Department of Atmospheric Sciences, National Central University, Taoyuan, 32001, Taiwan

<sup>2</sup>Department of Civil and Environmental Engineering, the University of Tennessee Knoxville, TN37996, USA

<sup>3</sup>Center for Environmental Monitoring and Technology, National Central University, Taoyuan, 32001, Taiwan

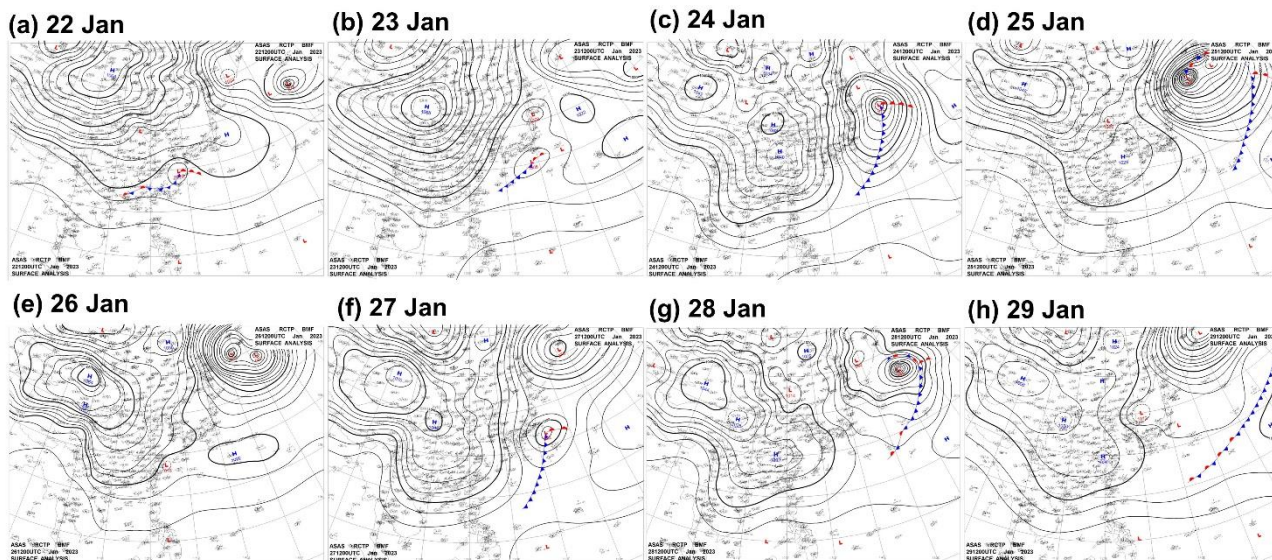

**Figure S1:** Surface weather maps for the weather pattern obtained by Taiwan Central Weather Bureau (<http://www.jma.go.jp/jp/g3/>).

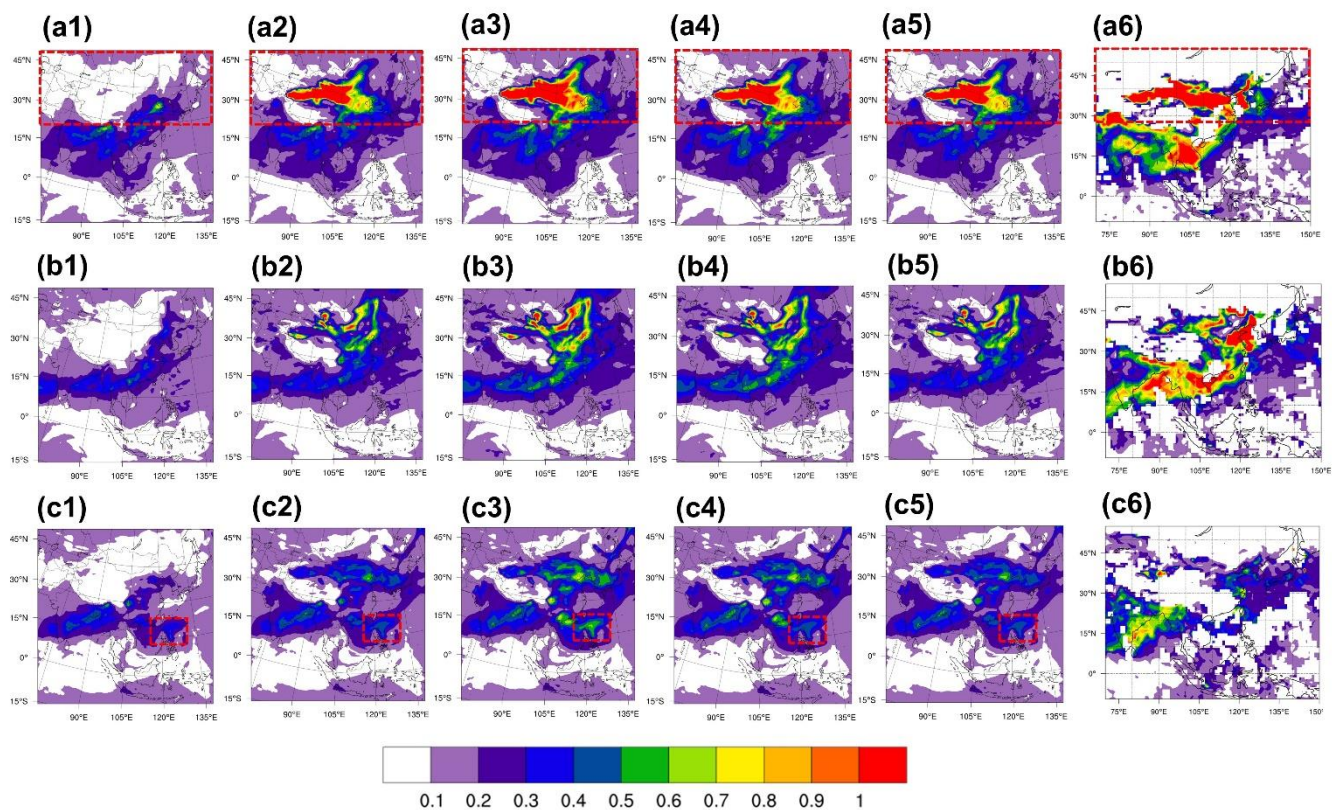

20  
21  
22  
23

**Figure S2:** The 3-days mean averaged AOD over East Asia region, for (1-5) CMAQ and (6) MODIS during 14-16 March 2021 (a1-a6), 26-28 March 2021 (b1-b6) and 17-19 April 2021 (c1-c6).

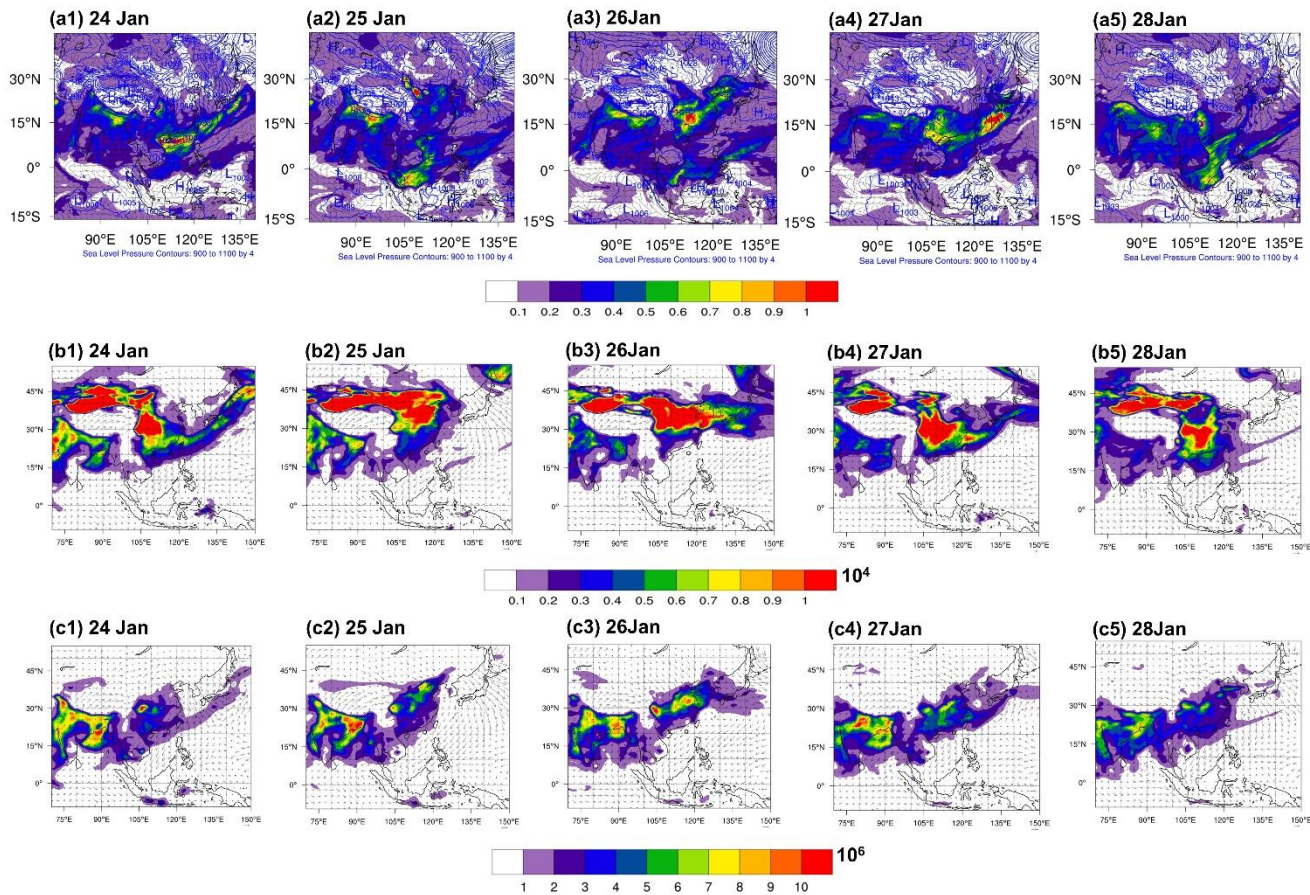

24  
 25 **Figure S3:** CMAQ AOD (a1-a5), MERRA2 dust mass column (b1-b5) and black carbon mass column (c1-c5) during 06 UTC (a1, b1, c1)  
 26 24 Jan, (a2, b2, c2) 25 Jan, (a3, b3, c3) 26 Jan, (a4, b4, c4) 27 Jan, (a5, b5, c5) 28 Jan 2023.  
 27

27

28

29

30
