# Supplementary material for: Modeling CMAQ dry deposition treatment over Western Pacific: A distinct characteristic of mineral dust and anthropogenic aerosol
Source: Copernicus journal article supplement (doi:10.5194/egusphere-2024-2549), 2024-09-10
Supplement: Supplementary file [file egusphere-2024-2549-AC1-supplement.pdf]

## **Reply to the comments of RC1**

### **RC1: General comment**

This paper describes a modeling study where four aerosol dry deposition schemes were used to model dust and BC. The Main point seems to be that one of the deposition schemes is best and improves the modeling of dust. This conclusion, however, is not well supported by the marginal improvement of some statistics relative to two measurements sites and MODIS AOD for brief periods during dust episodes. The problem is that the observed data is very meager and concluding that one scheme is best assumes that all other aspects of the modeling system are perfect, especially the dust emissions. Also, this a very specific application for short periods of time so there is no reason to think that these conclusions are generally relevant. Another problem with this study is that the relative performance of the four deposition schemes is not consistent with other modeling studies. In particular, the P22 scheme typically results in significantly greater deposition velocities than the E20 scheme. Also, Fig 5 shows that P22 is almost the same as PR11. This suggests that there were errors made in running these models. Table 2 says that CMAQv5.4 was used. If the STAGE option was used for dry deposition (which should be noted in the Table) a choice of S22, E20, and P22 are available. However, PR11 is not. How was this used?. Table 2 also states that the NOAH LSM was used in WRF. CMAQ needs several parameters from WRF that typically are output when using the PX LSM. When NOAH is used, default calculations for these parameters, which are important for deposition, are made in the Meteorology-Chemistry Interface Processor (MCIP). These calculations are not the same as in the LSM and will result in additional errors. There are many grammatical and other sloppy errors in the text. Far too many for me to correct.

**Response:** We greatly appreciate the referee#1 for the suggestions to improve the manuscript. All of the changes in the revised manuscript have been highlighted in **yellow**. Corrections (**blue text**) with line numbers indicated in this response document refer to the revised manuscript.

Our point-by-point responses to the reviewer's comments are given below:

**General comment 1:** This paper describes a modeling study where four aerosol dry deposition schemes were used to model dust and BC. The Main point seems to be that one of the deposition schemes is best and improves the modeling of dust. This conclusion, however, is not well supported by the marginal improvement of some statistics relative to two measurements sites and MODIS AOD for brief periods during dust episodes. The problem is that the observed data is very meager and concluding that one scheme is best assumes that all other aspects of the modeling system are perfect, especially the dust emissions. Also, this a very specific application for short periods of time so there is no reason to think that these conclusions are generally relevant.

**Response:** We thank the reviewer for the comments. For the reviewer's concern, the present study focuses on the difference of the dust model improvement using the dry deposition schemes embedded in CMAQv5.4, particularly over the western Pacific region, which used Taiwan as the primary receptor. The importance of using Taiwan's observation data for CMAQ model evaluation has been highlighted. We have mentioned as **"The model performance in Taiwan is paramount in our study, as the area is equipped with a substantial number of well-maintained surface observation sites, providing comprehensive coverage. The LABS station in the high-altitude subtropical western North Pacific region serves as the sole background station for monitoring transboundary pollutants. This station is crucial in our research as it provides**

unique data on the long-range transport of pollutants, further underscoring the relevance of our study.” **Page 3-4, Line 79-83.**

We also agree that dust emissions at the Asian continental level should be considered. We have included the model evaluation over most parts of mainland China, considering the dust source and nearby source region. 100 observation sites have been obtained from the Chinese air quality online monitoring analysis platform’s website ([www.aqistudy.cn/](http://www.aqistudy.cn/)). The averaged observed PM<sub>10</sub> and PM<sub>2.5</sub> concentrations from the responding dataset were used to evaluate the model performance for the latest dust emission scheme, as well as four dry deposition schemes. Also, instead of the 10-day simulation in January 2023, we widened the simulation period by considering the multiple dust storm episodes during spring 2021 for about 40 days of simulation (12 Mar-20 Apr 2021). We added the discussion as “In addition, the hourly PM<sub>10</sub> and PM<sub>2.5</sub> of nearly 100 sites distributed over mainland China (Fig. S1), covering the period of 12 March-20 April 2021, obtained from Chinese air quality online monitoring analysis platform’s website ([www.aqistudy.cn/](http://www.aqistudy.cn/)).” **Page 8, Line 188-190.**

Also, we have added the discussion as “During the spring of 2021, a series of dust storms (15 March, 27 March, and 18 April) occurred over the Gobi area, with one of the most significant dust storms in the past decade (15 March, the “3.15” dust storm hereafter) causing environmental impact over the continental (Jin et al., 2022; Gui et al., 2022; He et al., 2022; Liang et al., 2022; Tang et al., 2022). More interestingly, one of the multiple dust storm episodes reached western Pacific Ocean due to the extreme typhoon episode (Kong et al., 2024). Hence, we intend to re-emphasize the precision of various deposition schemes on the CMAQ for the recent dust storm episode over the Asian Continental highlighted by Kong et al. (2024). We evaluated the CMAQ simulations with the different dry deposition schemes for the 40-day sensitivity test on 12 March-20 April 2021 against measured PM<sub>10</sub> and PM<sub>2.5</sub> concentrations across the observation sites in mainland China (Table 4). The observation sites used for the model comparison are marked in Fig. S1. Generally, the evaluation results for Taiwan and mainland China were consistent. During the 40 days of Spring 2021, the CMAQ PM<sub>10</sub> of NMB was the highest for Off\_PR11 (NMB = -79.19 %), followed by Dust\_PR11 (-60.53 %). The latest inline dust emission scheme embedded with E20 dry deposition scheme for PM<sub>10</sub> was well performed by NMB of -25.43 %, compared to the Dust\_S22 (-45.97 %) and Dust\_P22 (-59.82 %). For the PM<sub>2.5</sub> simulation, Dust\_PR11 has been improved from Dust\_Off, and Dust\_S22 was slightly better than Dust\_E20.

Figure 5 shows the scatter plot of simulated and observed PM across mainland China. The correlation coefficient (R), a factor of two (FAC2), and the mean observed and simulated PM are marked in Figure 5. The modeled PM<sub>10</sub> without the dust scheme had the lowest correlation, followed by Dust\_PR11. Among all of these simulations, Dust\_E20 performed the best correlation (R > 0.3) compared to Dust\_PR11, Dust\_S22 and Dust\_P22. However, for PM<sub>2.5</sub>, the correlation between the model and measured values was similar for all the dry deposition schemes. The statistical index of FAC2 was used in the present work since either low or high outliers less influence it (Chan and Hanna, 2004). The dataset is reliable for FAC2 values between 0.5 and 2.0, with the ideal model of 1.0. The simulated PM<sub>10</sub> by E20 performed well, with a nearly perfect value of 1.1. Meanwhile, the PM<sub>2.5</sub> by S22 simulation was slightly better than E20 but much better than the other experiments.” **Page 11, Line 259-284.**

**Table 4.** CMAQ evaluation for PM<sub>10</sub> and PM<sub>2.5</sub> against the averaged 100 observation sites across mainland China (Fig. S1) and AOD against MODIS daily observation near the dust source region (above 30°N) with Normalized Mean Bias (NMB) under the multiple simulation

scenarios (Fig. S3). Spring 2021, 3.15, 3.27, and 4.18 represent the evaluation period by 12 March-20 April 2021, 14-16 March 2021, 26-28 March 2021, and 17-19 April 2021, respectively.

| Parameters        | Period      | CMAQ-M3DRY |           | CMAQ-STAGE |          |          |
|-------------------|-------------|------------|-----------|------------|----------|----------|
|                   |             | Off_PR11   | Dust_PR11 | Dust_E20   | Dust_S22 | Dust_P22 |
| PM <sub>10</sub>  | Spring 2021 | -79.15     | -60.53    | -25.43     | -45.97   | -59.82   |
| PM <sub>2.5</sub> | Spring 2021 | -60.94     | -44.84    | -37.50     | -36.29   | -42.47   |
| AOD               | 3.15        | -81.92     | -49.54    | -38.97     | -46.41   | -48.45   |
|                   | 3.27        | -75.10     | -46.12    | -36.39     | -41.84   | -44.52   |
|                   | 4.18        | -55.88     | -16.49    | -3.20      | -7.83    | -14.52   |
|                   | Mean        | -70.97     | -37.38    | -26.19     | -32.03   | -35.83   |
|                   | AOD         |            |           |            |          |          |

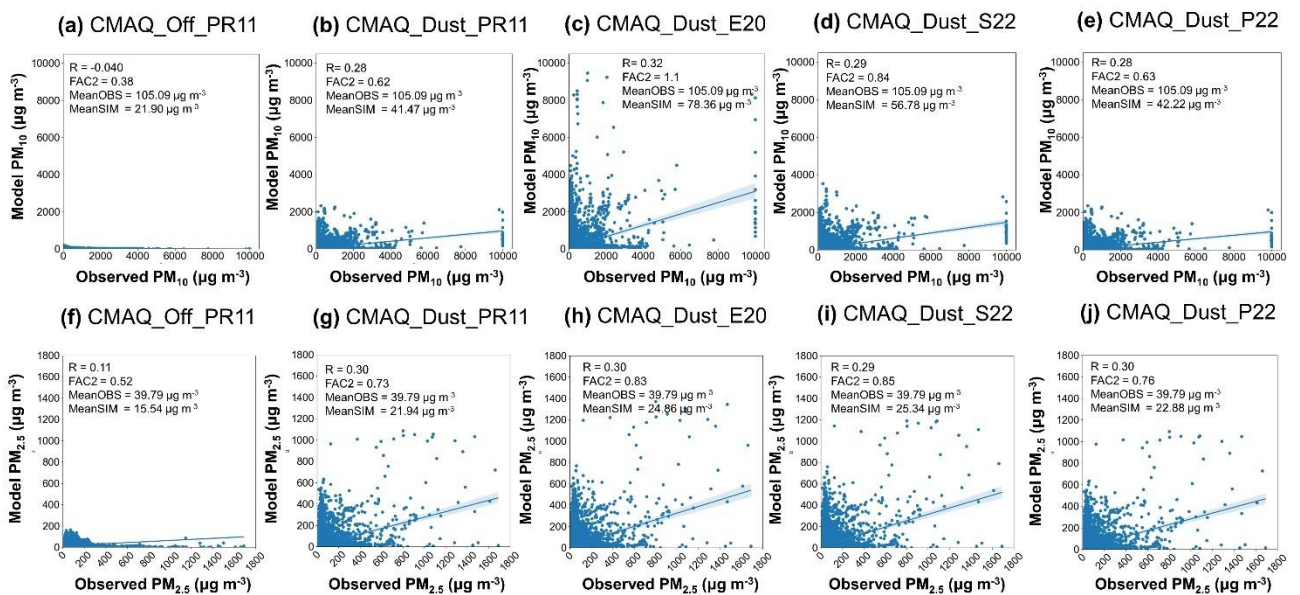

**Figure 5:** The scatter plot of the observed against modeled PM<sub>10</sub> (a-e) and PM<sub>2.5</sub> (f-j) for CMAQ\_Off\_PR11 (a, f), CMAQ\_Dust\_PR11 (b, g), CMAQ\_Dust\_E20 (c, h), CMAQ\_Dust\_S22 (d, i) and CMAQ\_Dust\_P22 (e, j), at the 100 sites of the mainland China on 12 March-20 April 2021 (<http://www.aqistudy.cn/>). R is the correlation coefficient between the observation and model; FAC2 is the factor of two; MeanOBS and MeanSIM are the mean of PM from observation and model, respectively.

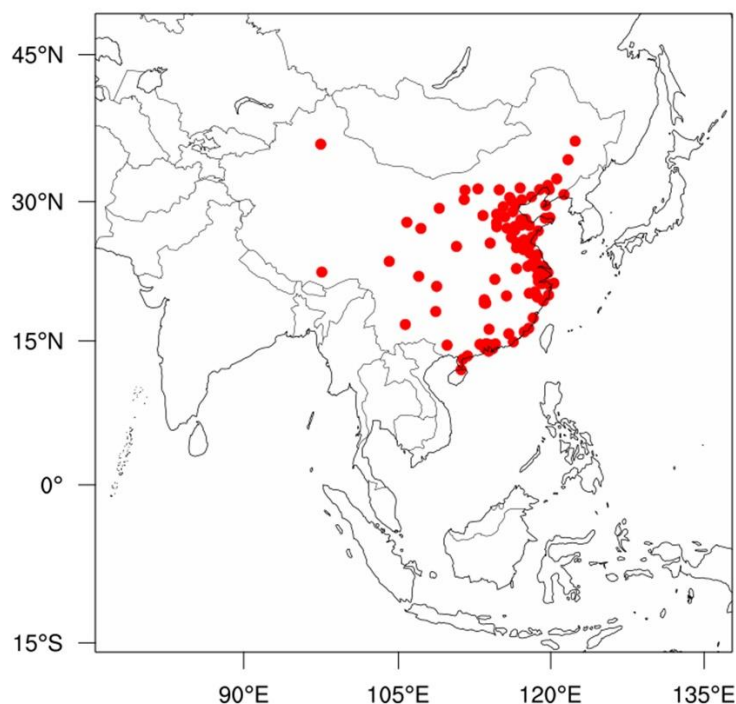

**Figure S1:** The location of monitoring sites over mainland China used for model evaluation (<http://www.aqistudy.cn/>).

**General comment 2:** Another problem with this study is that the relative performance of the four deposition schemes is not consistent with other modeling studies. In particular, the P22 scheme typically results in significantly greater deposition velocities than the E20 scheme. Also, Fig 5 shows that P22 is almost the same as PR11. This suggests that there were errors made in running these models.

**Response:**

We agree with the reviewer regarding the P22 and E20. The greater deposition velocity is by P22 than E20, particularly in the coarse mode. The STAGE and M3DRY under CMAQv5.4 have been examined over Continental U.S.A. (CONUS) during July 2016 (USEPA, 2024). The difference in modeled particulate matter between PR11 and P22 dry deposition was within 5 %, and the time series trend was similar. To justify the present model result of PR11 and P22, we purposely replot the corresponding PM10 and PM25 for a clear comparison (Fig. S5). Moreover, the STAGE by E20 simulated a higher PM<sub>2.5</sub> compared to STAGE P22 (USEPA, 2024). This shows that the model testing results over the CONUS were consistent with the East Asia domain demonstrated in the present study.

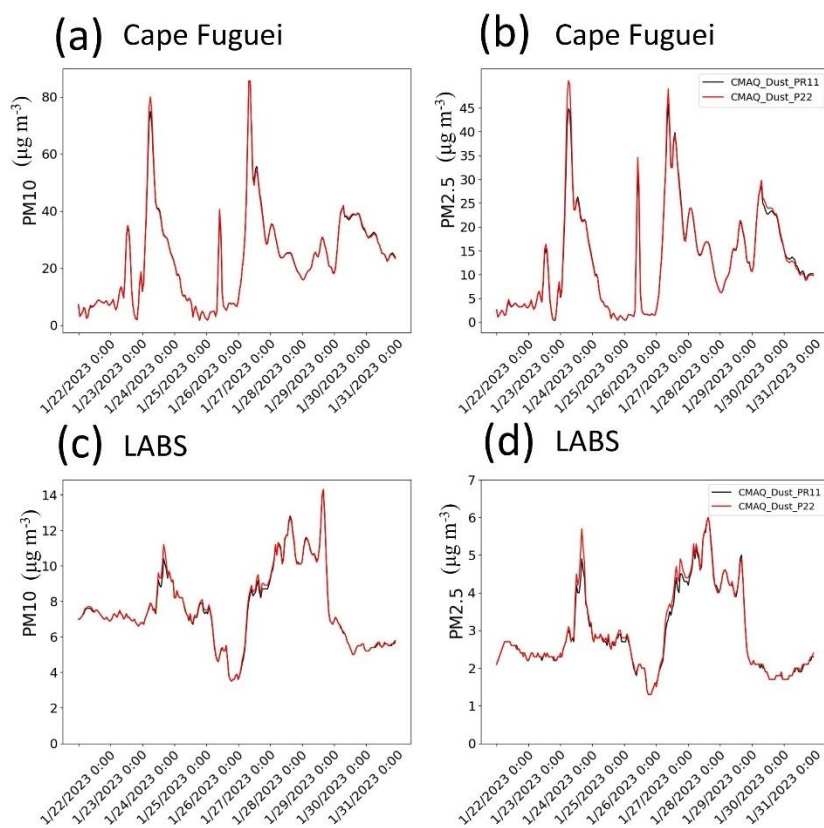

**Figure S6:** Time series of PM<sub>10</sub> (left panel) and PM<sub>2.5</sub> (right panel) concentrations during 22–31 January 2023 under CMAQ\_Dust\_PR11 and CMAQ\_Dust\_P22 simulations over the Cape Fuguei (upper panel) and LABS (lower panel), representing the surface and high altitude, respectively.

Also, we have updated the STAGE dry deposition description as “Moreover, Surface Tiled Aerosol and Gaseous Exchange (STAGE) deposition has been implemented within the CMAQv5.3, where estimated fluxes from sub-grid cell fractional land-use values, aggregates the fluxes to the model grid cell and unifies the bidirectional and unidirectional deposition schemes using the resistance framework (Massad et al., 2010; Nemitz et al., 2001). The updated STAGE version in CMAQv5.4 could aggregate the grid-scale values that match the grid-scale values from most kinds of Land Surface Model of WRF (Hogrefe et al., 2023).” **Page 6, Line 146-152.**

#### References:

U.S. Environmental Protection Agency: [https://github.com/USEPA/CMAQ/wiki/CMAQ-Release-Notes:-Dry-Deposition-Air-Surface-Exchange:-Surface-Tiled-Aerosol-and-Gaseous-Exchange-\(STAGE\)](https://github.com/USEPA/CMAQ/wiki/CMAQ-Release-Notes:-Dry-Deposition-Air-Surface-Exchange:-Surface-Tiled-Aerosol-and-Gaseous-Exchange-(STAGE)), last access 15 October 2024.

Hogrefe, C., Bash, J. O., Pleim, J. E., Schwede, D. B., Gilliam, R. C., Foley, K. M., Appel, K. W., and Mathur, R.: An analysis of CMAQ gas-phase dry deposition over North America through grid-scale and land-use-specific diagnostics in the context of AQMEII4, *Atmos. Chem. Phys.*, 23, 8119–8147, <https://doi.org/10.5194/acp-23-8119-2023>, 2023.



**General comment 3:** Table 2 says that CMAQv5.4 was used. If the STAGE option was used for dry deposition (which should be noted in the Table) a choice of S22, E20, and P22 are available. However, PR11 is not. How was this used?.

**Response:** We have included the dry deposition options in Table 1. Also, the corresponding changes have been used to modify the scenario description in Table 2. We change the tables as below:

**Table 1.** Model settings.

| Model setting                             | Descriptions                                                                                                                                             |
|-------------------------------------------|----------------------------------------------------------------------------------------------------------------------------------------------------------|
| Period                                    | 12 March-20 April 2021 and 22-31 January 2023                                                                                                            |
| Domain                                    | d01, d02, and d03 with 45 KM, 15 KM, and 5 KM of the resolutions, respectively                                                                           |
| Boundary condition                        | NCEP FNL lateral boundary condition                                                                                                                      |
| Surface and land surface model            | NOAH                                                                                                                                                     |
| Numerical weather model                   | WRF v40, including grid and observation nudging at d01.                                                                                                  |
| Chemical transport model                  | CMAQ v5.4                                                                                                                                                |
| Gas-phase chemistry and aerosol mechanism | CB06e51 + AE7                                                                                                                                            |
| Emission Inventory                        | MICS-ASIA III emission in 2023, adjusted from the emission in 2017 (Zhang et al., 2018) based on the OMI-NO <sub>x</sub> satellite (Huang et al., 2021). |
| Online dust treatment                     | The windblown dust treatment suggested by Kong et al. (2024).                                                                                            |
| Dry deposition option                     | M3DRY (PR11) and STAGE (E20, S22 and P22).                                                                                                               |

**Table 2.** Simulation scenarios used in this present study.

| Scenarios      | Descriptions                                                                                                                                 |
|----------------|----------------------------------------------------------------------------------------------------------------------------------------------|
| CMAQ_Off_PR11  | Without in-line dust calculation, with the M3DRY dry deposition algorithm by Pleim and Ran (2011).                                           |
| CMAQ_Dust_PR11 | Implement the latest refined dust treatment proposed by Kong et al. (2024), with the M3DRY dry deposition algorithm by Pleim and Ran (2011). |
| CMAQ_Dust_E20  | Same as CMAQ_Dust_PR11, but with the STAGE dry deposition algorithm by Emerson et al. (2020).                                                |
| CMAQ_Dust_S22  | Same as CMAQ_Dust_PR11, but with the STAGE dry deposition algorithm by Shu et al. (2022).                                                    |
| CMAQ_Dust_P22  | Same as CMAQ_Dust_PR11, but with the STAGE dry deposition algorithm by Pleim et al. (2022).                                                  |

**General comment 4:** Table 2 also states that the NOAH LSM was used in WRF. CMAQ needs several parameters from WRF that typically are output when using the PX LSM. When NOAH is used, default calculations for these parameters, which are important for deposition, are made in the Meteorology-Chemistry Interface Processor (MCIP). These calculations are not the same as in the LSM and will result in additional errors.

**Response:** We greatly appreciate the reviewer's comments. The reason for using PXLSTM is to get the look-up table directly from WRF PXLSTM, which would be readable by the MCIP calculation needed for the deposition algorithm. However, under the STAGE option, the

mapping by source code in ASX\_DATA\_MOD.F could be set up to simulate most kinds of LSM, including NOAH and CLM. With NOAH, the parameterizations, including Z0, VEG, and LAI, were directly taken from the WRF look-up table. In addition, the NOAH-LSM contains additional LU importance in simulating dust deserts such as playa and white sand, which is not included in PXLISM. So, applying NOAH-LSM over East Asia, which experienced frequent dust episodes, could be more representative. However, we do realize that due to the difference in LU categories and soil type of both PXLISM and NOAH, the impact on aerosol (PM10/PM25) emission and deposition can vary, and we shall propose this idea as our future model testing.

**General comment 5:** There are many grammatical and other sloppy errors in the text. Far too many for me to correct.

**Response:** We thank the reviewer for the suggestion. The grammar of the manuscript has been proofread by Grammarly (version Premium) online text editor.

**RC1: Specific comments and responses**

**Comment 1:** Table 1 has many errors. For example, the equations for PR11 are all for gasses not aerosols. Please remove Table 1.

**Response:** We thank the reviewer for the suggestion. Table 1 has been removed.

**Comment 2:** Line 17. P20 should be P22.

**Response:** We have revised the term P20 to P22. **Page 1, Line 20.**

**Comment 3:** L19. This sentence implies that dry deposition directly affects dust emissions.

**Response:** The sentence has been revised. We corrected the sentence as “The result showed that the dry deposition parameterization could significantly improve the CMAQ in simulating PM<sub>10</sub> and PM<sub>2.5</sub> concentrations.” **Page 1, Line 17-18.**

**Comment 4:** L30. Sentence does not make sense.

**Response:** The sentence emphasized the LABS measurement located at 2862 m.s.l. showed the mixing of dust and black carbon from 22-31 January 2023. We corrected the sentence as “On 22-31 January 2023, the *in-situ* measurement of the upper level observed the coexistence of natural dust and anthropogenic aerosol.” **Page 1, Line 29-30.**

**Comment 5:** L32-33. This sentence “resolving the uncertainty of the CMAQ dust emission treatment” is a gross overstatement.

**Response:** Agree. We have revised the sentence as “We proposed implementing the E20 dry deposition approach, narrowing the uncertainty of the CMAQ dust emission treatment.” **Page 1, Line 31-33.**

**Comment 6:** L38. Does not make sense.

**Response:** The sentence has been revised. We modified the sentence as “Among these, particle dry deposition is a crucial aerosol removal process and an important sink for particles in the model.” **Page 1, Line 36-38.**

**Comment 7:** L51. Again, a gross overstatement: “Emerson et al. (2020) has resolved the problem.”

**Response:** Agree. We have revised the sentence as “The latest dry deposition scheme revision by Emerson et al. (2020) has reduced the uncertainty, marking a significant step forward in our quest for more accurate air quality modeling.” **Page 2, Line 50-52.**

**Comment 8:** L64. What “boarder”?

**Response:** We have revised the sentence as “The surface fine particle concentrations can vary up to 5-15 %, and the particle dry deposition has more than 200 % discrepancy due to the different dry deposition schemes. (Saylor et al., 2019).” **Page 3, Line 62-64.**

**Comment 9:** L70-72. Does not make sense.

**Response:** The statement mentioned the simulated PM<sub>10</sub> underestimation caused by the uncertainty of the deposition mechanism. We changed the sentence as “Besides the model bias on PM<sub>2.5</sub>, the simulation of PM<sub>10</sub> has been underestimated due to the uncertainty of the deposition mechanism, particularly over the western Pacific.” **Page 3, Line 69-70.**

**Comment 10:** L92-93. Fix notation.

**Response:** The notation has been fixed. We modified the notation as “

$$u_{*,t} = u_{*,t0} f_m f_r \quad (1)$$

Where  $u_{*,t0}$  is the ideal threshold friction velocity, while  $f_m$  and  $f_r$  are the correction factors of soil moisture and surface roughness, respectively.” **Page 5, Line 113-115.**

**Comment 11:** L100. Bulb?

**Response:** The word has been corrected as “...and bulk soil density...”. **Page 5, Line 122.**

**Comment 12:** L115-118. This is very sloppy. Please fix  $V_s$  and  $V_g$

**Response:** The physical formulation and notation have been corrected as below: “

$$V_d = V_s + \frac{1}{R_a + R_s} \quad (3)$$

where  $V_s$  is the gravitation settling velocity,  $R_a$  is the resistivity aerodynamic and  $R_s$  is the surface resistivity. The  $V_s$  is calculated according to Stokes’s Law as:

$$V_s = \frac{\rho_p D_p^2 g C_c}{18\eta} \quad (4)$$



where,  $\rho_p$  is the density of the particle;  $D_p$  is the diameter of the particle;  $g$  is gravitational acceleration;  $C_c$  is the Cunningham correction factor for small particles; and,  $\eta$  is the dynamic viscosity of air.” **Page 6, Line 137-142.**

**Comment 13:** L122-123. This is not true: “Dry deposition is based on gravitational settling velocity ( $V_g$ ), which is the function of aerodynamic and surface resistance.”

**Response:** Agree. The statement has been removed.

**Comment 14:** L126. Should note that STAGE is one of two options, the other being M3Dry.

**Response:** Agree. The methodology has been revised as “CMAQ is embedded with M3Dry dry deposition calculation that implements the scheme of Pleim and Ran (2011), which is based on Slinn (1982). As noted by Pleim and Ran (2011), chemical surface flux modeling has become an essential process in the air quality model. For instance, the linkages of ambient concentration levels to the deposition of  $SO_x$  and  $NO_x$ . Moreover, Surface Tiled Aerosol and Gaseous Exchange (STAGE) deposition has been implemented within the CMAQv5.3, where estimated fluxes from sub-grid cell fractional land-use values, aggregate the fluxes to the model grid cell and unifies the bidirectional and unidirectional deposition schemes using the resistance framework (Massad et al., 2010; Nemitz et al., 2001). The updated STAGE version in CMAQv5.4 could aggregate the grid-scale values that match the grid-scale values from most kind of Land Surface Model of WRF (Hogrefe et al., 2023).” **Page 6, Line 143-152.**

**Comment 15:** L137. Here, and many other places, abbreviations such as PSEA are used without defining. Also, SDS, WPO.

**Response:** The abbreviations have been defined as “...peninsular Southeast Asia (PSEA)...”. **Page 7, Line 159.**

The abbreviation SDS is removed and replaced with the full defining terms. We modified it to “Super Dust Storm.” **Page 11, Line 289.**

The abbreviation WPO is removed and replaced with the full defining terms. We modified it to “western Pacific Ocean.” **Page 9, Line 210-211.**

**Comment 16:** L139. What are the chemical LBCs?

**Response:** The chemical LBC was generated by a time-invariant set of predefined, vertical concentration profiles. For nested simulations, the dynamic boundary conditions are extracted from CCTM output from a coarse-grid simulation (USEPA, 2010).

Reference:

U.S. Environmental Protection Agency: Operational Guidance for the Community Multiscale Air Quality (CMAQ) Modeling System Version 4.7.1, [https://www.cmascenter.org/cmaq/documentation/4.7.1/Operational\\_Guidance\\_Document.pdf](https://www.cmascenter.org/cmaq/documentation/4.7.1/Operational_Guidance_Document.pdf), 2010.

**Comment 17:** L156. CMAQ\_Dust\_PR11 is repeated.

**Response:** We thank the reviewer for the comment. The additional “CMAQ\_Dust\_PR11” is removed.

**Comment 18:** L177. Don’t see dust claw.

**Response:** The statement has been revised. We modified the sentence as “The satellite image showed dust induced by a high-pressure system on 24-25 January (Fig. 2a3, 2a4). The next day, the same region was covered by a thick cloud, and dust was again widely distributed from 27-30 January 2023.” **Page 8, Line 202-204.**

**Comment 19:** L199. Table 3 should be 4.

**Response:** Table 3 remains. **Page 9, Line 224.**

**Comment 20:** L209. Numbers are reversed.

**Response:** We thank the reviewer for the comment. The numbers in the text are correct as Table 3 has been modified between the columns of Dust\_S22 and Dust\_P22. We have corrected the table as below:

**Table 3.** Statistical evaluation for PM<sub>10</sub> and PM<sub>2.5</sub> concentrations during 22-31 January 2023 for Cape Fuguei under the multiple simulation scenarios.

|                         |         | Benchmark | CMAQ-M3DRY |           | CMAQ-STAGE |          |          |
|-------------------------|---------|-----------|------------|-----------|------------|----------|----------|
|                         |         |           | Off PR11   | Dust_PR11 | Dust_E20   | Dust_S22 | Dust_P22 |
| <b>PM<sub>10</sub></b>  |         |           |            |           |            |          |          |
|                         | MeanObs |           | 49.97      | 49.97     | 49.97      | 49.97    | 49.97    |
|                         | MeanMod |           | 21.19      | 22.97     | 29.04      | 26.48    | 23.04    |
|                         | NMSE    |           | 0.82       | 0.71      | 0.49       | 0.56     | 0.71     |
|                         | NMB     | ± 85%     | -57.59     | -54.05    | -41.90     | -47.01   | -53.90   |
|                         | Corr    | > 0.35    | 0.41       | 0.44      | 0.52       | 0.46     | 0.42     |
|                         | NMBF    |           | -1.36      | -1.18     | -0.72      | -0.89    | -1.17    |
| <b>PM<sub>2.5</sub></b> |         |           |            |           |            |          |          |
|                         | MeanObs |           | 15.52      | 15.52     | 15.52      | 15.52    | 15.52    |
|                         | MeanMod |           | 12.48      | 12.95     | 13.86      | 14.15    | 13.16    |
|                         | NMSE    |           | 0.31       | 0.29      | 0.29       | 0.30     | 0.31     |
|                         | NMB     | ± 85%     | -19.55     | -16.53    | -10.65     | -8.84    | -15.22   |
|                         | Corr    | > 0.35    | 0.52       | 0.55      | 0.53       | 0.53     | 0.52     |
|                         | NMBF    |           | -0.24      | -0.20     | -0.12      | -0.10    | -0.18    |

**Comment 21:** Fig 4. Hard to tell the different model runs apart especially for the PM25. It would help to expand the scale on the PM25 plots.

**Response:** The scale on the PM<sub>2.5</sub> plots in Fig.4 has been expanded. We modified the figure as:

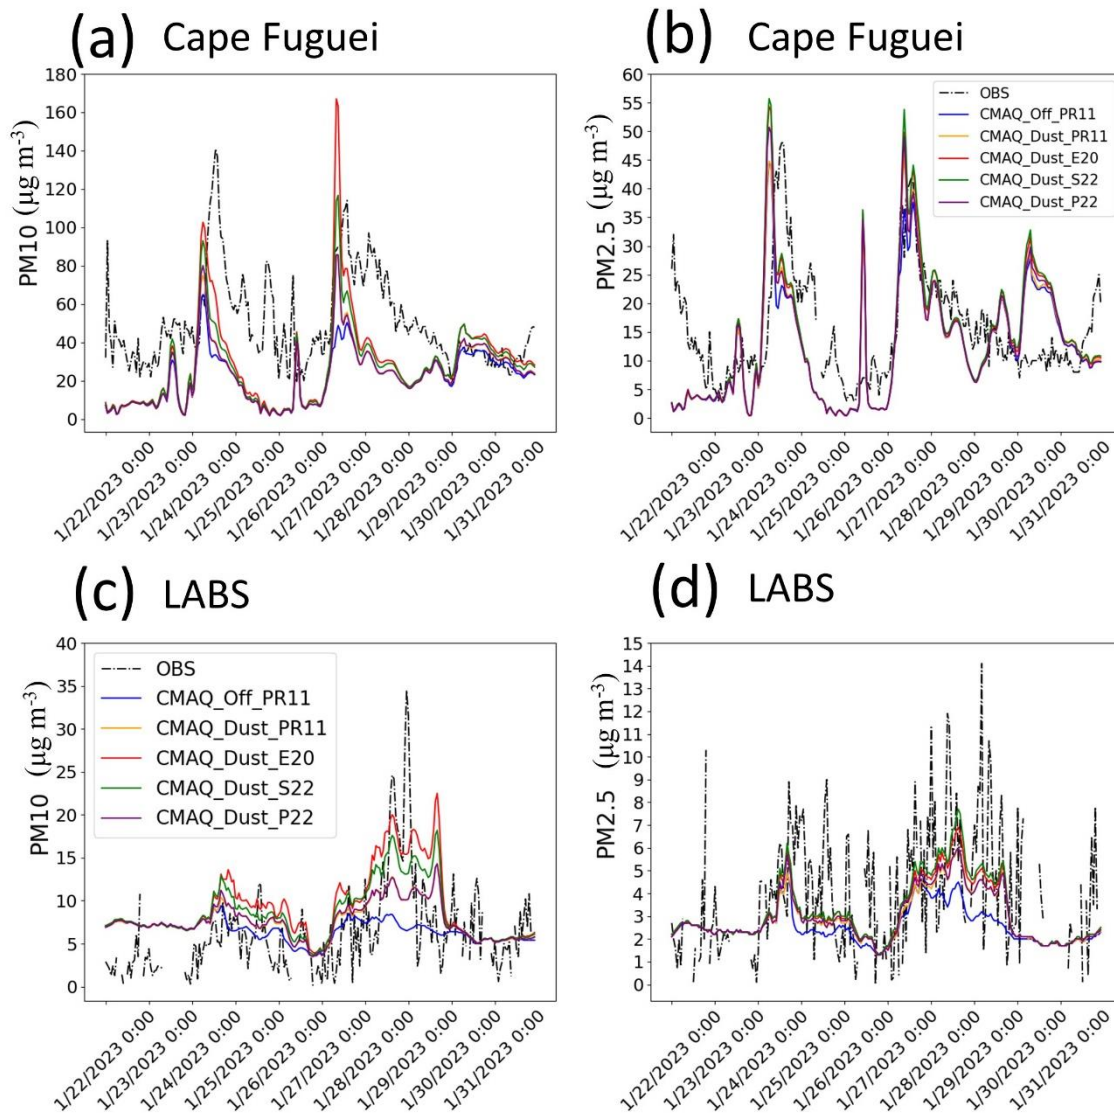

**Figure 4:** Time series of PM<sub>10</sub> (left panel) and PM<sub>2.5</sub> (right panel) concentrations during 22-31 January 2023 under multiple deposition schemes over the Cape Fuguei (upper panel) and LABS (lower panel), representing the surface and high altitude, respectively.

**Comment 22:** L224. Where is “the north peninsula of Southeast Asia”?

**Response:** The term has been revised. We have modified the term as “northern PSEA”.  
**Page 10, Line 250.**

**Comment 23:** L251. There is something wrong here. P22 and PR11 should be very different.

**Response:** Please refer to the response of **General Comment 2**.

**Comment 24:** L275-276. These results seem contrary to other modeling studies where P22 generally has greater much V<sub>d</sub> for Accumulation mode than E20. Maybe put these numbers in a table.

**Response:** Agree. The statement in the text was referring to the median of deposition velocity, which indicates that S22 was the highest median value among all. For the deposition velocity

at the 75<sup>th</sup> percentile, 75 % of the  $V_d$  for P22 was higher than E20. We have modified the sentence as “As shown in the figure, the median of E20, S22, and P22 increased the deposition velocity of the Aitken (accumulation) modes particle as compared to PR11 by 22.56 (11.32) %, 117.76 (86.43) % and 2.5 (7.52) % respectively.” **Page 13, Line 318-320.**

Also, the  $V_d$  values of the four dry deposition schemes has been included in supplementary. We added the Table S1 as below:

**Table S1:  $V_d$  percentiles ( $\text{cm s}^{-1}$ ) of atiken, accumulation and coarse particle modes by the four dry deposition schemes.**

| Dry deposition schemes | Percentiles      | Aitken | Accumulation | Coarse |
|------------------------|------------------|--------|--------------|--------|
| PR11                   | 25 <sup>th</sup> | 0.033  | 0.020        | 0.046  |
|                        | 50 <sup>th</sup> | 0.056  | 0.036        | 0.059  |
|                        | 75 <sup>th</sup> | 0.086  | 0.066        | 0.186  |
| E20                    | 25 <sup>th</sup> | 0.043  | 0.025        | 0.046  |
|                        | 50 <sup>th</sup> | 0.068  | 0.040        | 0.053  |
|                        | 75 <sup>th</sup> | 0.102  | 0.066        | 0.092  |
| S22                    | 25 <sup>th</sup> | 0.076  | 0.041        | 0.043  |
|                        | 50 <sup>th</sup> | 0.122  | 0.068        | 0.052  |
|                        | 75 <sup>th</sup> | 0.201  | 0.114        | 0.077  |
| P22                    | 25 <sup>th</sup> | 0.034  | 0.021        | 0.048  |
|                        | 50 <sup>th</sup> | 0.057  | 0.039        | 0.067  |
|                        | 75 <sup>th</sup> | 0.089  | 0.073        | 0.208  |

**Comment 25:** L286 (Fig.7). Why not show dry deposition velocity for each model rather that difference from PR11?

**Response:** We thank the reviewer for the question. The primary goal of our study is to enhance the performance of the latest dust model by implementing STAGE deposition schemes in contrast to the M3DRY scheme. Simply showing the difference from PR11 is most significant as it provides a clear overview of how the model has been enhanced, thereby advancing our understanding of dust modeling behavior. The dry deposition velocity for each model is also displayed at the supplementary document. We added Fig. S4 as:



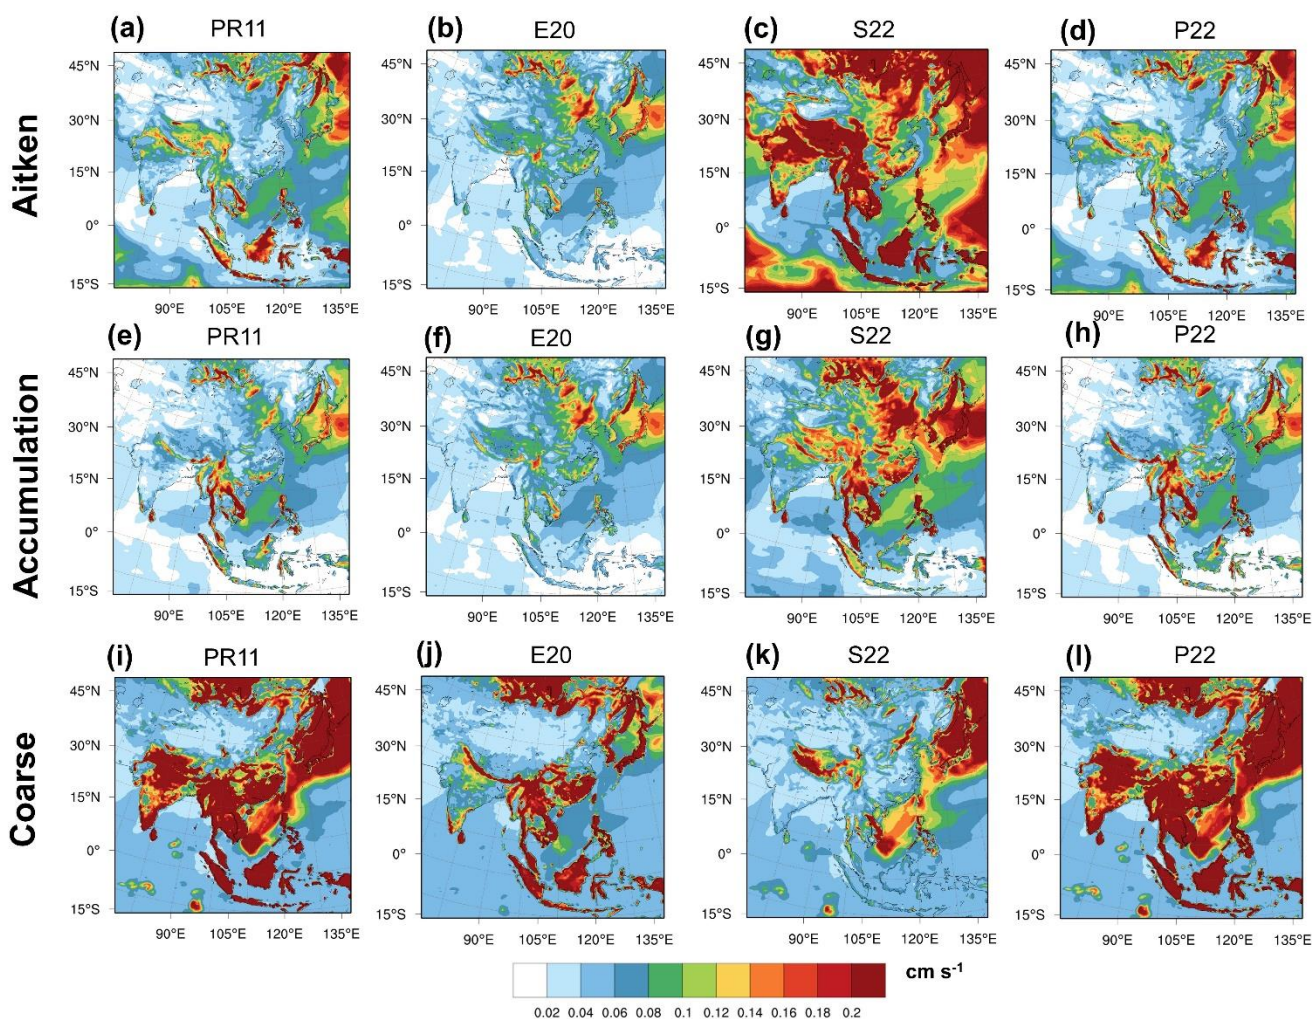

**Figure S4:** CMAQ estimated 10 days (22-31 January 2023) averaged for the (a-d) Aitken, (e-h) accumulation, and (i-l) coarse particle modes for (a, e, i) PR11, (b, f, j) E20, (c, g, k) S22 and (d, h, l) P22 dry deposition schemes

**Comment 26:** L300. Elemental

**Response:** The term has been revised. We modified the sentence as “Black carbon, often known as elemental carbon, released from the biofuels, fossil fuels and biomass burning, has been proven to impact the radiative budget and regional climate”. **Page 14, Line 346-347.**

**Comment 27:** L330. Trans what boundary?

**Response:** The term has been modified as “... the long-range transport of modeled black carbon ...”. **Page 15, Line 376.**

**Comment 28:** L350-351. The modeled BC in Fig 11h seems to end at Taiwan. Also, there is no Fig 11i.

**Response:** Fig. 11h is replaced by Fig. 12d; Fig. 11i has been removed and changed as Fig. 12e. We fixed the figure number as “As shown in Fig. 12d, the modeled black carbon was found distributed at the western Pacific Ocean. In Fig. 12e, a clear black carbon dome was distributed along 700 hPa, showing a similar pattern as dust.” **Page 15-16, Line 396-399.**

**Comment 29:** L353. This phrase makes no sense: “as the coarse particles could comprise of fine particles”.

**Response:** The phrase has been removed. We change the sentence as “This simulation proposes the consistency of the “double dome” mechanism of Asian dust and biomass burning episodes” Page 16, Line 398-399.

**Comment 30:** L373. “vastly” is again an overstatement.

**Response:** The term has been removed. We change the sentence as “...surface PM<sub>10</sub> has been improved by ...” Page 16, Line 416.
